# Supplementary material for: Inflammatory Bowel Disease and Neurodegenerative Disorders: Integrated Evidence from Mendelian Randomization, Shared Genetic Architecture and Transcriptomics
Source: bioRxiv or medRxiv preprint supplement (doi:10.1101/2022.05.23.22275264), 2022-05-25
Supplement: Supplementary file [file media-1.zip]

## Supplementary Information

**Supplementary Figure S1. Forest plots illustrate the effect of inflammatory bowel disease (IBD) on neurodegenerative disorders.** A. IBD on amyotrophic lateral sclerosis (ALS); B. IBD on Alzheimer's disease (AD); C. IBD on Parkinson's disease (PD); D. IBD on multiple sclerosis (MS).

**Supplementary Figure S2. Leave-one-out sensitivity analysis for inflammatory bowel disease (IBD) on neurodegenerative disorders.** A. IBD on amyotrophic lateral sclerosis (ALS); B. IBD on Alzheimer's disease (AD); C. IBD on Parkinson's disease (PD); D. IBD on multiple sclerosis (MS).

**Supplementary Figure S3. Funnel plots evaluating the horizontal heterogeneity for the effect of inflammatory bowel disease (IBD) on neurodegenerative disorders.** A. IBD on amyotrophic lateral sclerosis (ALS); B. IBD on Alzheimer's disease (AD); C. IBD on Parkinson's disease (PD); D. IBD on multiple sclerosis (MS); E. Crohn's disease (CD) on ALS; F. CD on AD; G. CD on PD; H. CD on MS; I. ulcerative colitis (UC) on ALS; J. UC on AD; K. UC on PD; L. UC on MS.

**Supplementary Figure S4. Forest plots demonstrate the effect of Crohn's disease (CD) and ulcerative colitis (UC) on neurodegenerative disorders.** A. CD on amyotrophic lateral sclerosis (ALS); B. CD on Alzheimer's disease (AD); C. CD on Parkinson's disease (PD); D. CD on multiple sclerosis (MS); E. UC on ALS; F. UC on AD; G. UC on PD; H. UC on MS.

**Supplementary Figure S5. Scatter plots of the causal effect of Crohn's disease (CD) and ulcerative colitis (UC) on neurodegenerative disorders.** A. CD on amyotrophic lateral sclerosis (ALS); B. CD on Alzheimer's disease (AD); C. CD on Parkinson's disease (PD); D. CD on multiple sclerosis (MS); E. UC on ALS; F. UC on AD; G. UC on PD; H. UC on MS.

**Supplementary Figure S6. Leave-one-out sensitivity analysis for Crohn's disease (CD) and ulcerative colitis (UC) on neurodegenerative disorders.** A. CD on amyotrophic lateral sclerosis (ALS); B. CD on Alzheimer's disease (AD); C. CD on Parkinson's disease (PD); D. CD on multiple sclerosis (MS); E. UC on ALS; F. UC on AD; G. UC on PD; H. UC on MS.

**Supplementary Figure S7. Transcriptomic analysis of shared risk loci.** A-B. mRNA expressions of SCFD1 (A) and HEATR5A (B) in IBD patients and control subjects from GSE112680. C-D. mRNA expressions of SCFD1 (C) and HEATR5A (D) in ALS patients and control subjects from E-MTAB-11349. E-F. Correlations between G2E3 expression and HEATR5A expression in IBD patients (E) and control subjects (F) from GSE112680. G-H. Correlations between SCFD1 expression and HEATR5A expression in IBD patients (G) and control subjects (H) from GSE112680. I-J. Correlations between G2E3 expression and HEATR5A expression in ALS patients (I) and

control subjects (**J**) from E-MTAB-11349. **K-L**. Correlations between *SCFD1* expression and *HEATR5A* expression in ALS patients (**K**) and control subjects (**L**) from E-MTAB-11349. \*  $P < 0.05$ , \*\*  $P < 0.01$ , \*\*\*  $P < 0.001$ , NS: non-significant.

**Supplementary Table S1. Characteristics of data sources used in this study**

**Supplementary Table S2. Detailed information for SNPs in the Mendelian Randomization analysis of inflammatory bowel disease (IBD) on neurodegenerative disorders.**

**Supplementary Table S3. Mendelian randomization (MR) analysis for the causality ulcerative colitis (UC) and Crohn's disease (CD) on neurodegenerative disorders.**

**Supplementary Table S4. Assessment of pleiotropy.**

**Supplementary Table S5. Mendelian randomization (MR) analysis for the causality of neurodegenerative disorders on inflammatory bowel disease (IBD), including ulcerative colitis (UC) and Crohn's disease (CD).**

**Supplementary Table S6. Genetic correlation between inflammatory bowel disease (IBD) and amyotrophic lateral sclerosis (ALS).**

**Supplementary Table S7. Functional enrichment of shared risk loci.**



Supplementary Figure S2

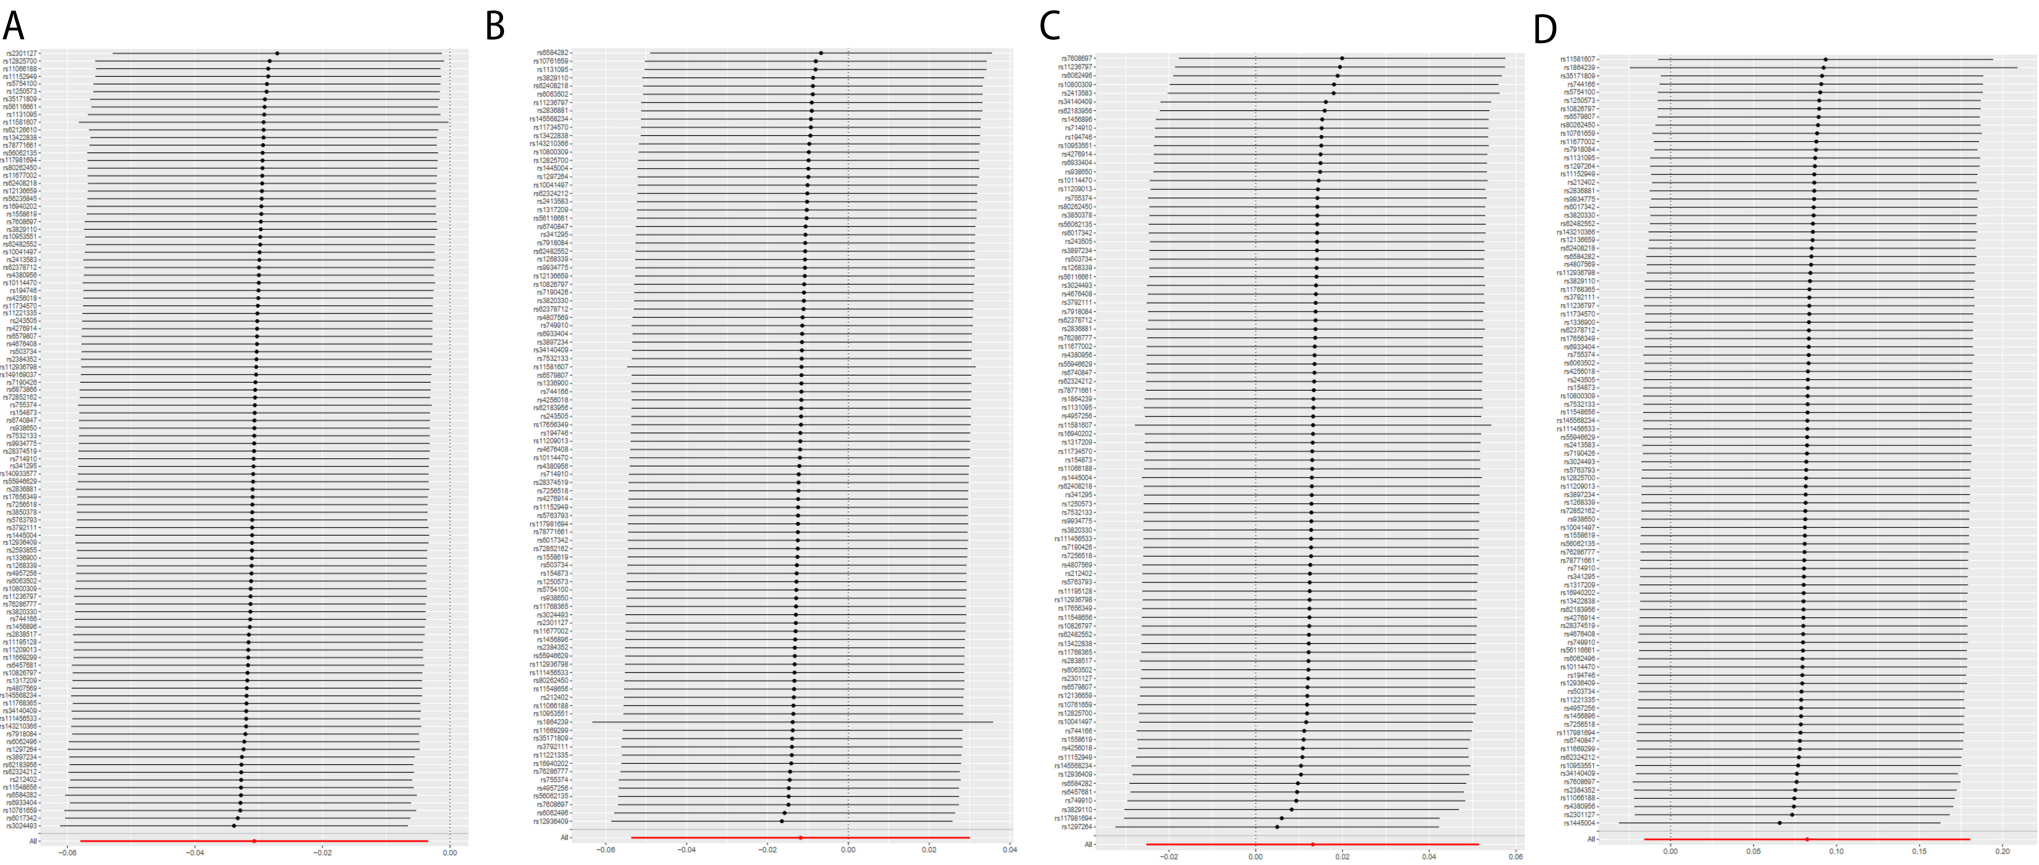



# Supplementary Figure S3

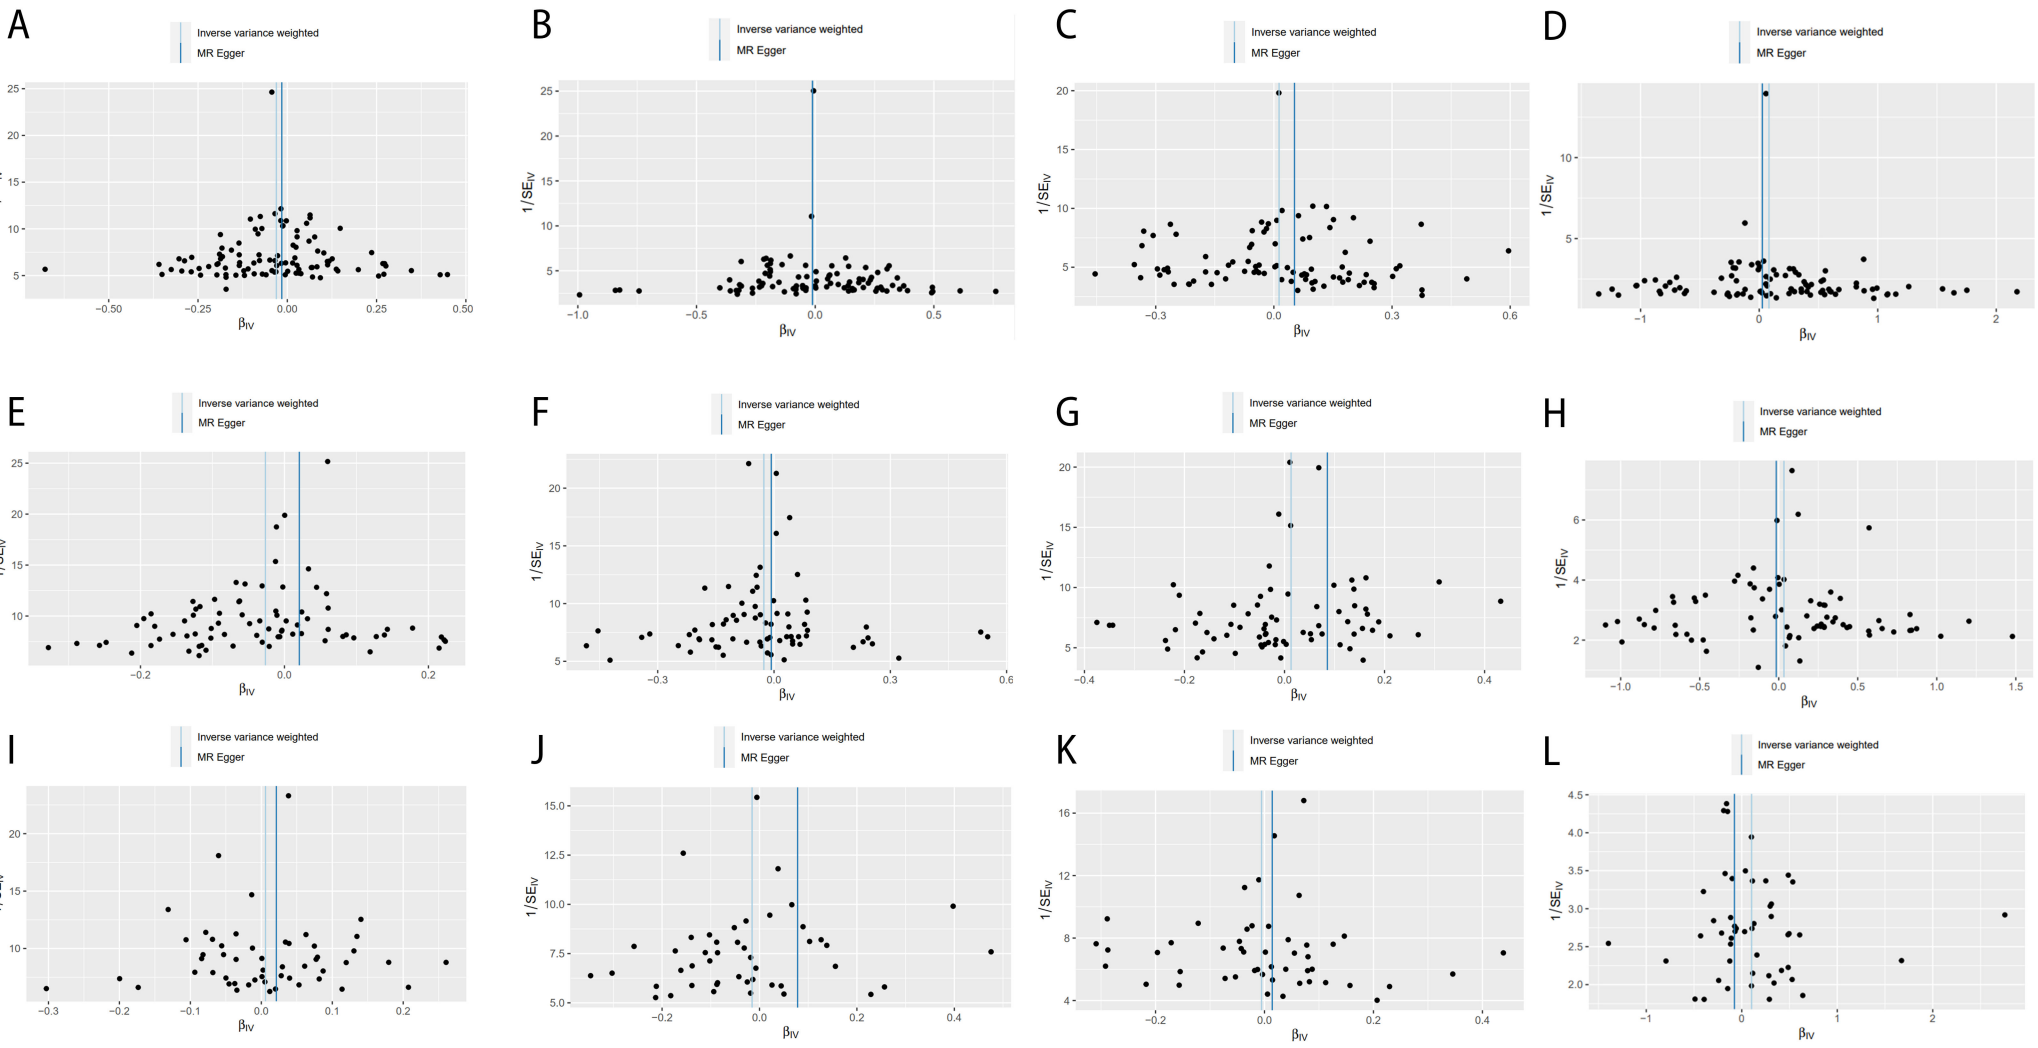

Supplementary Figure S4

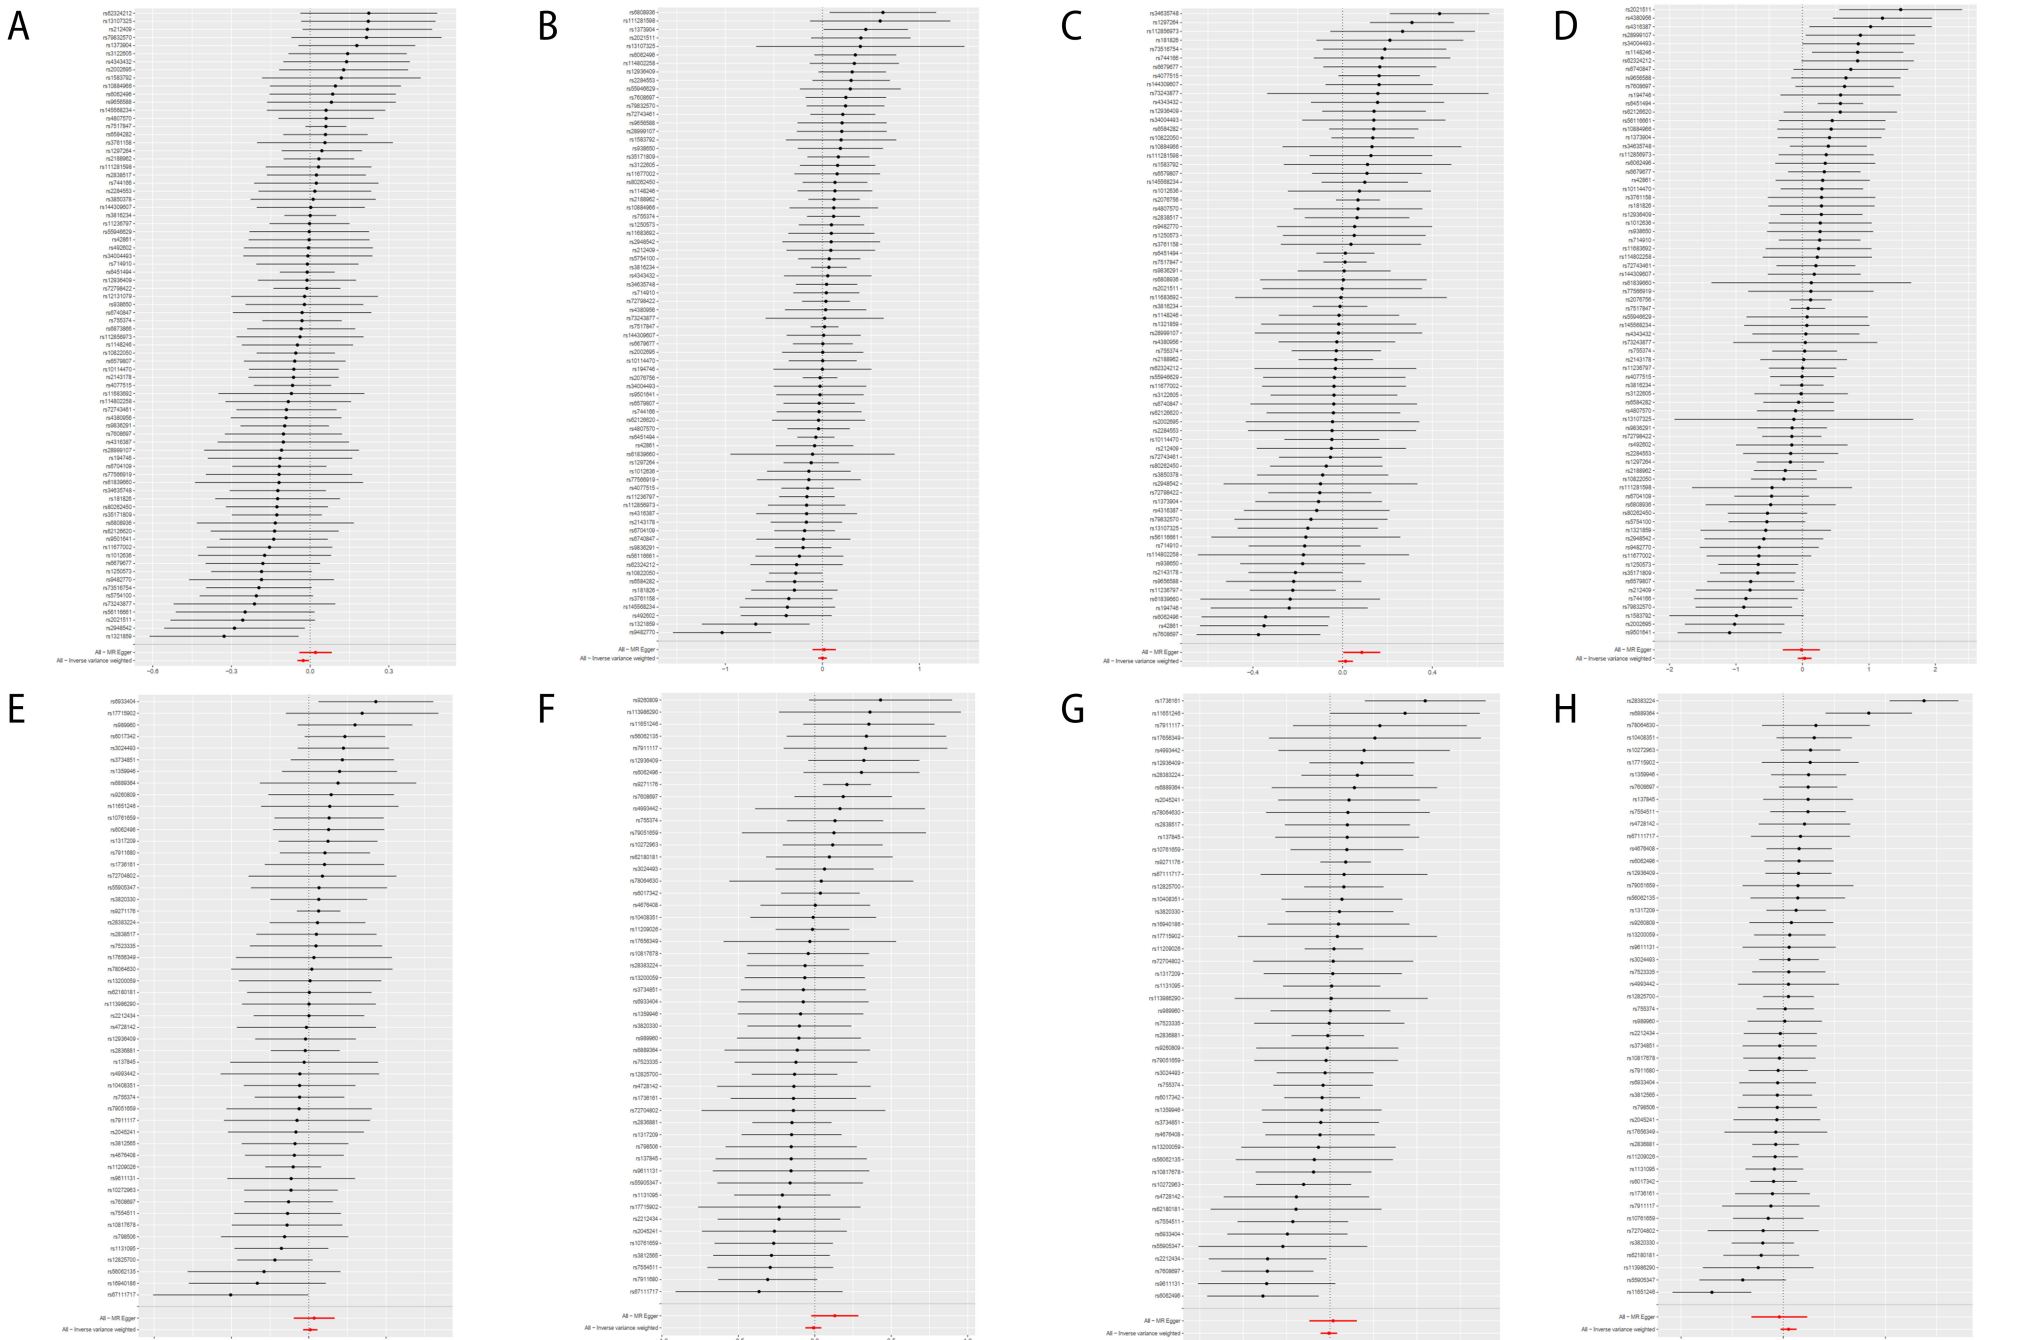

# Supplementary Figure S5

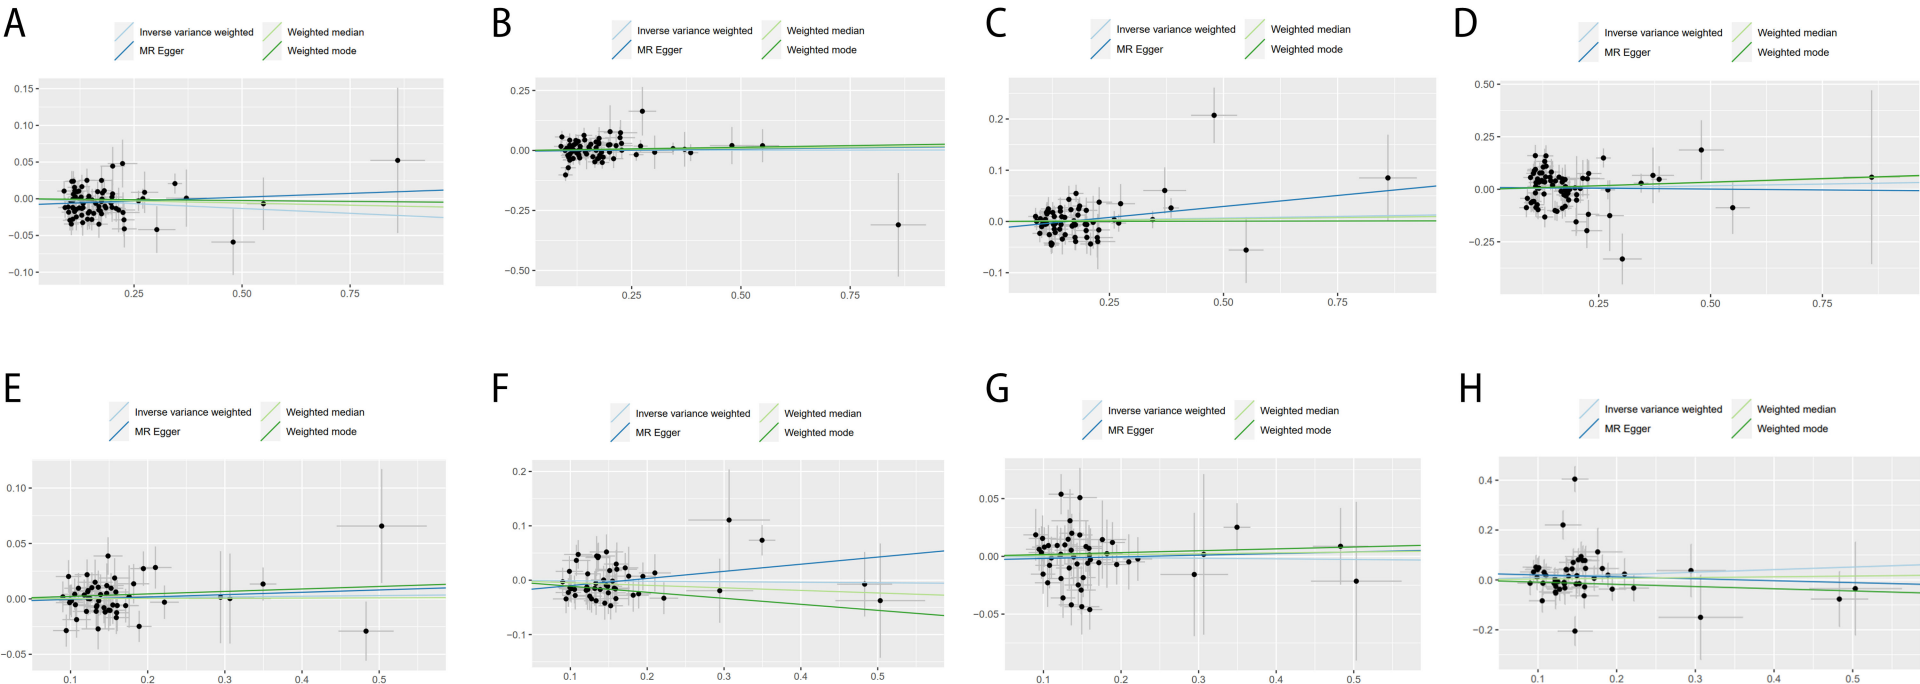

# Supplementary Figure S6

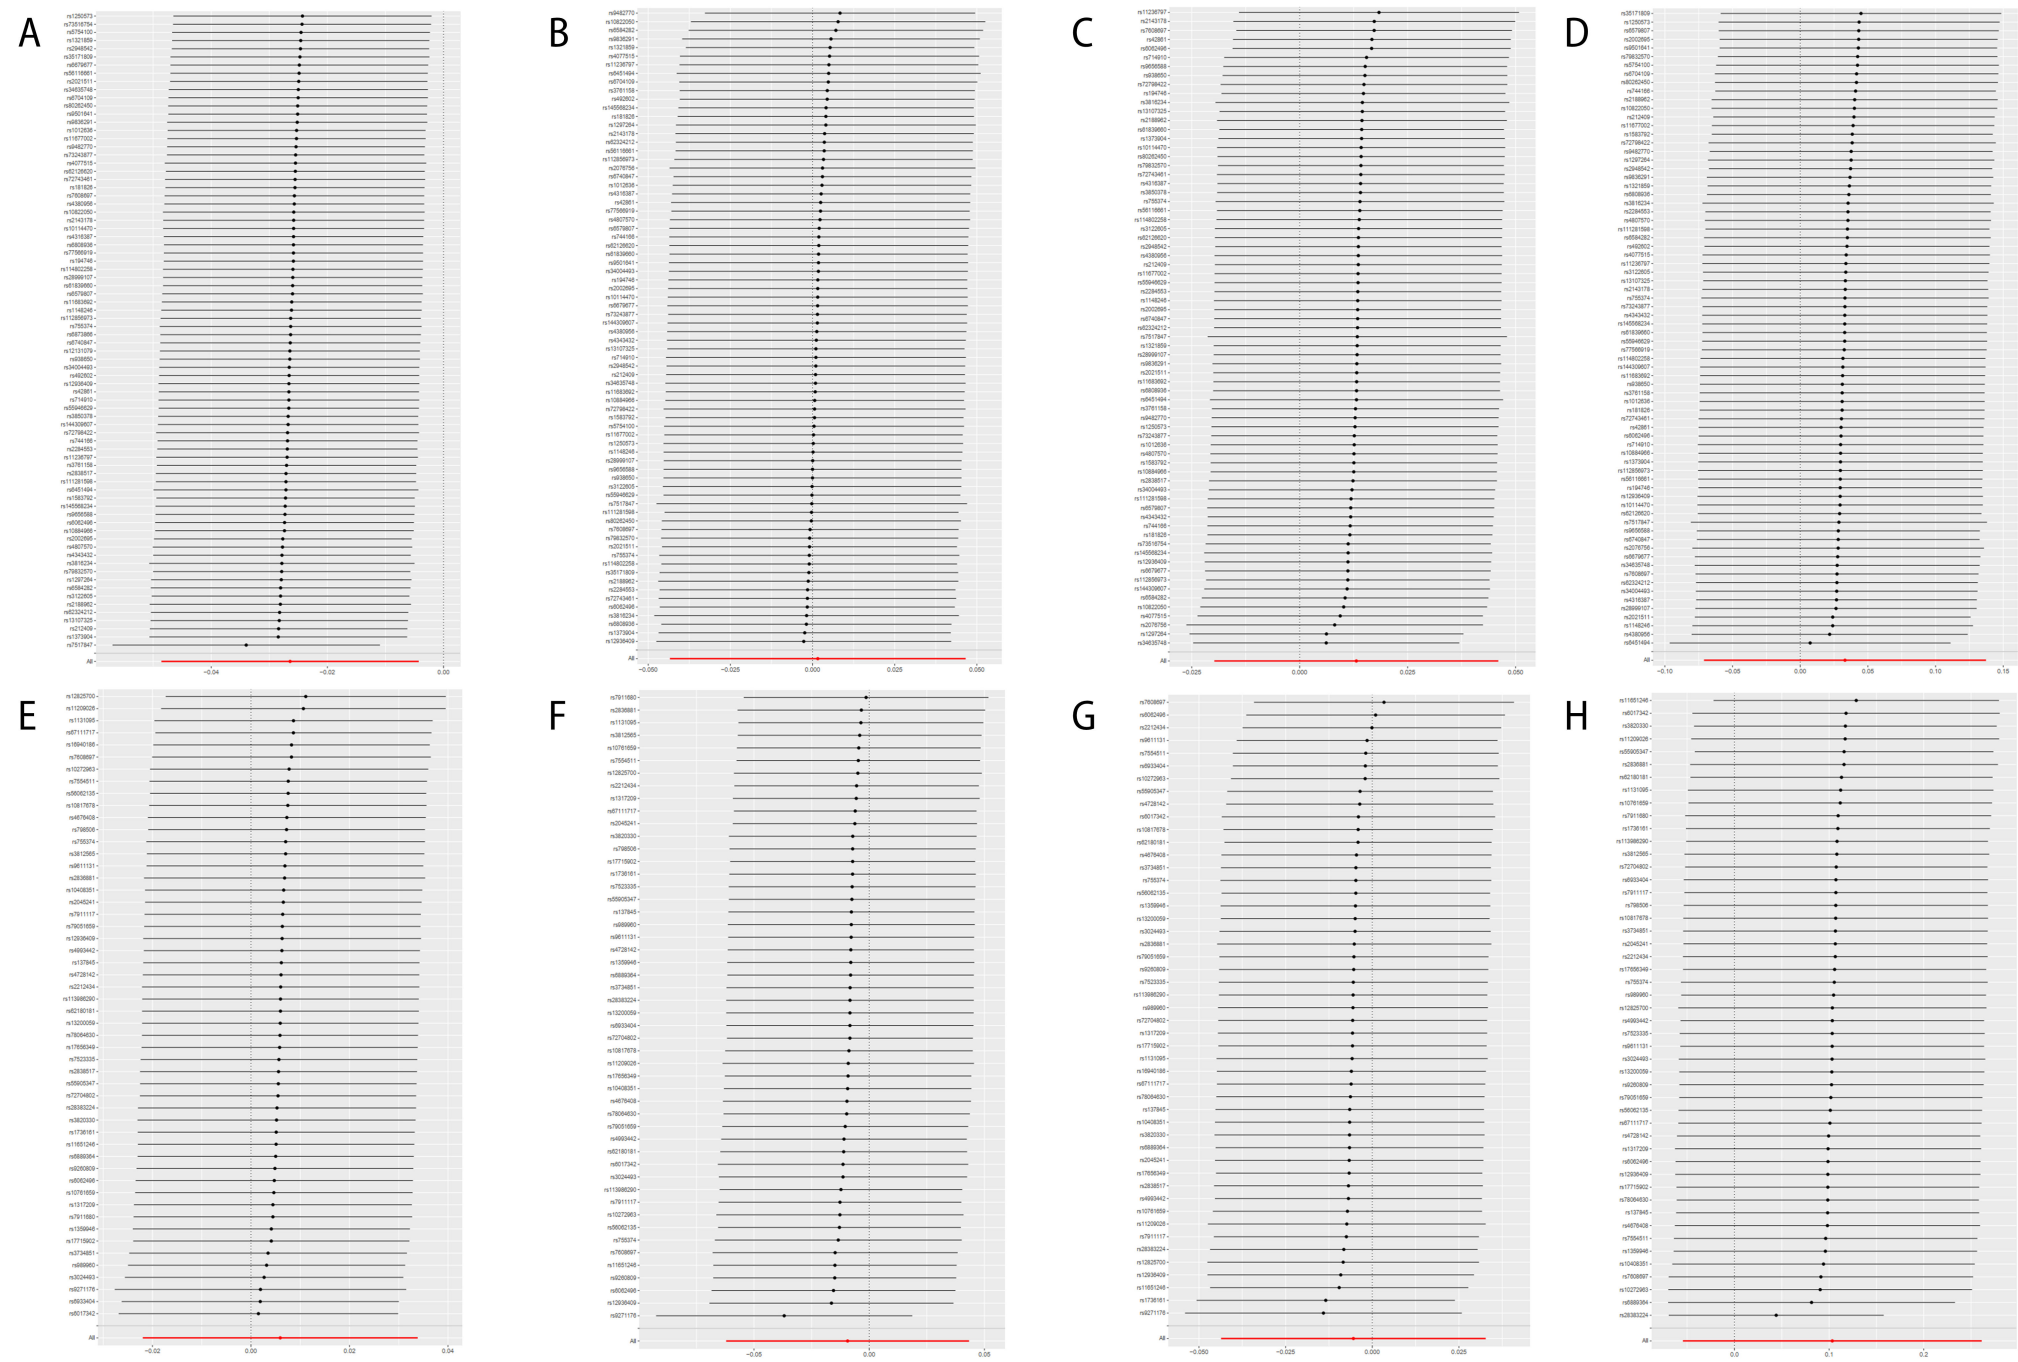

Supplementary Figure S7

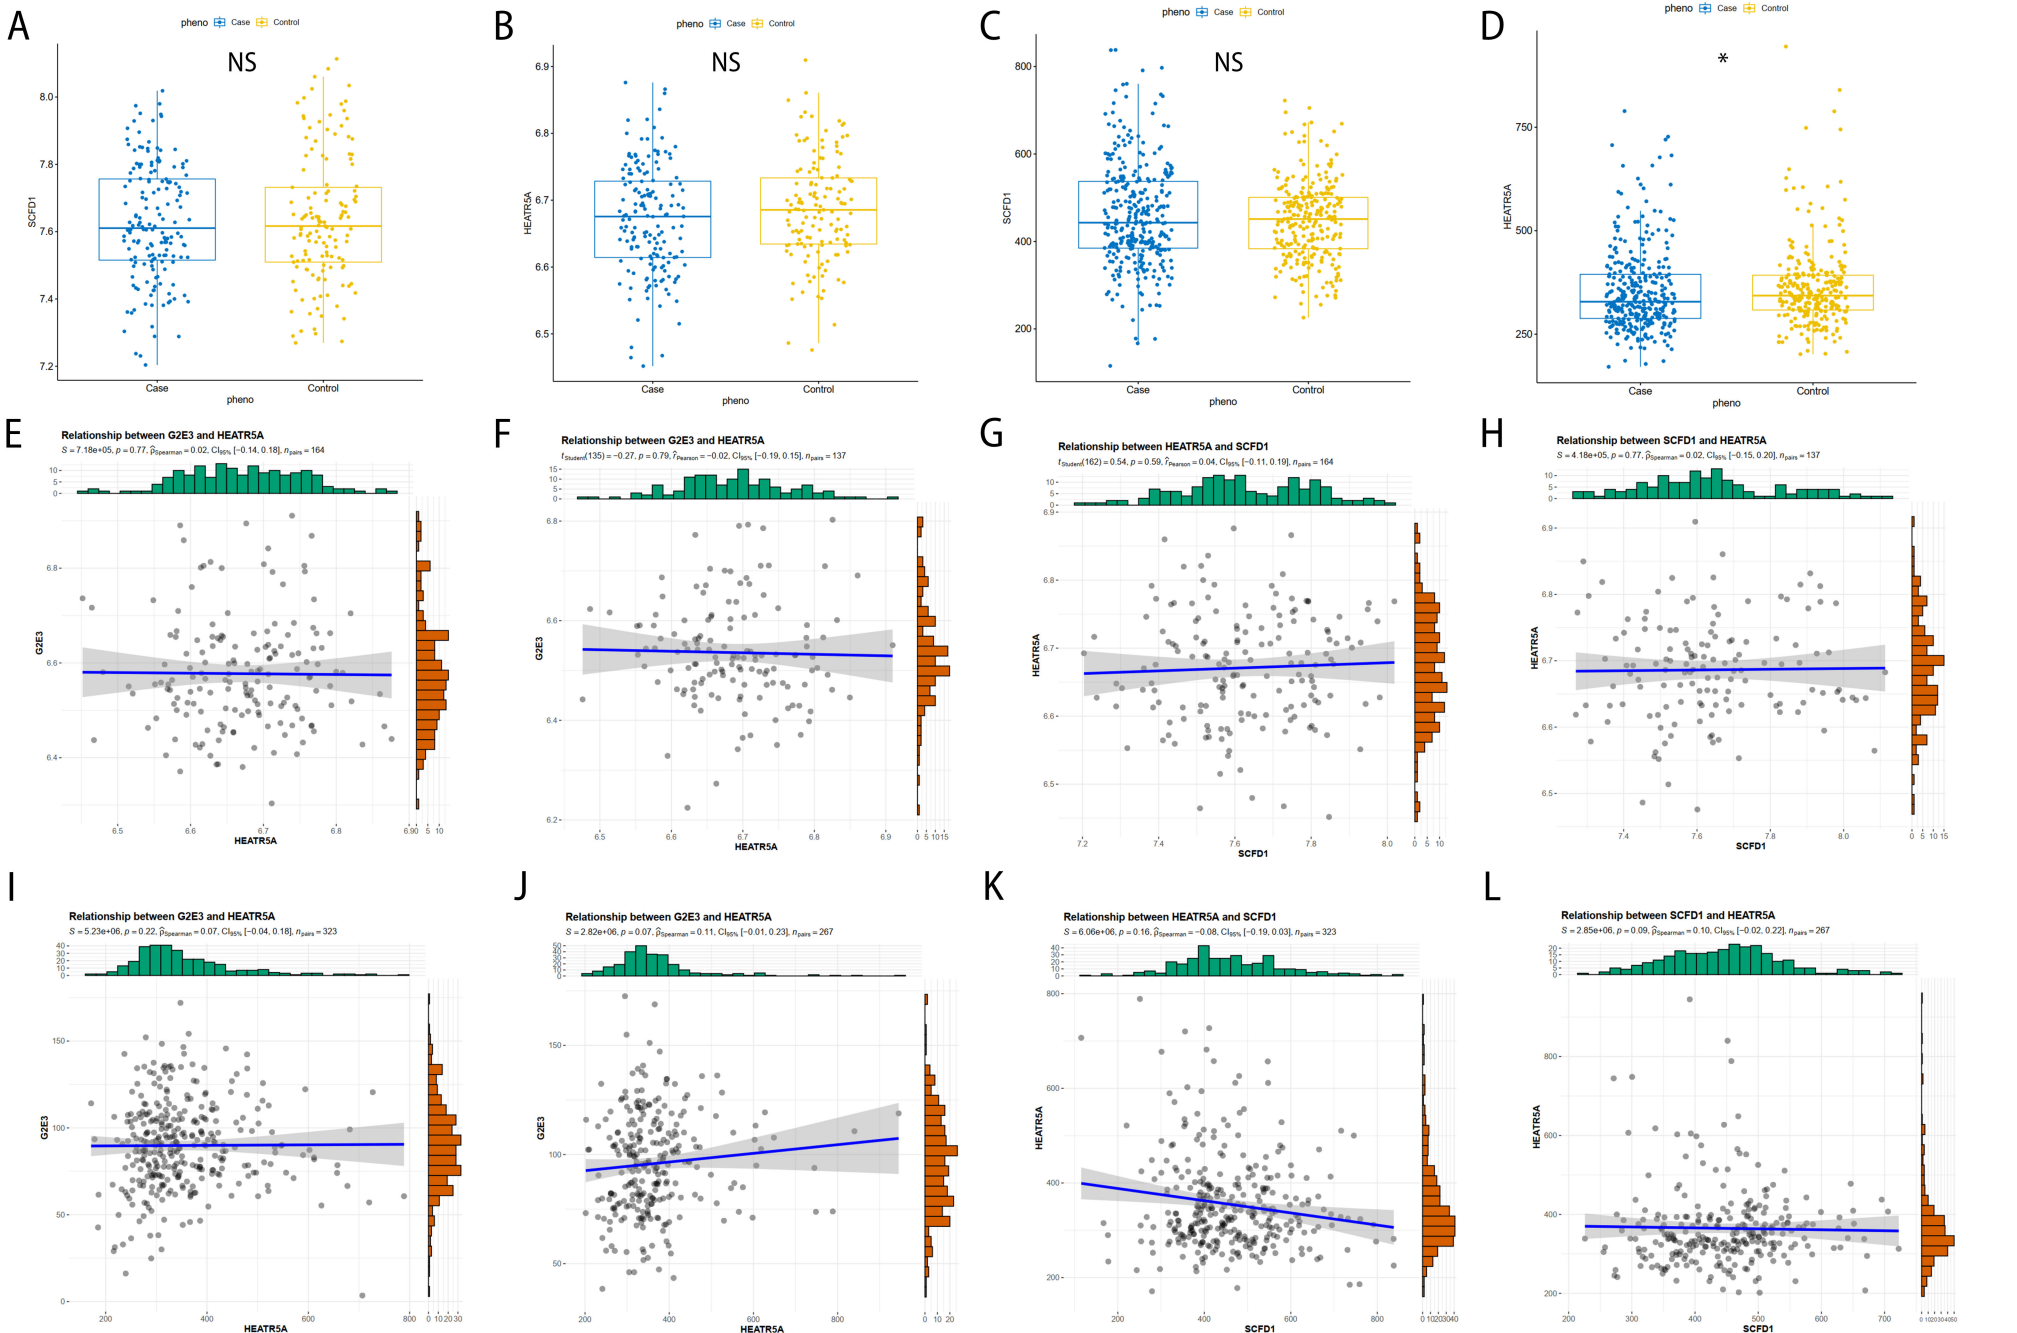

**Supplementary Table S1. Characteristics of data sources used in this study**

| <b>Traits</b> | <b>Data sources</b>                                            | <b>Sample size<br/>(cases/controls)</b> | <b>Ancestry</b> | <b>Reference</b>                                              |
|---------------|----------------------------------------------------------------|-----------------------------------------|-----------------|---------------------------------------------------------------|
| IBD           | <i>Nature Genetics</i>                                         | 25,042/34,915                           | European        | de Lange et al., 2017                                         |
| CD            |                                                                | 12,194/28,072                           |                 |                                                               |
| UC            |                                                                | 12,366/33,609                           |                 |                                                               |
| ALS           | <i>Neuron</i>                                                  | 20,806/59,804                           | European        | Nicolas et al., 2018                                          |
| AD            | FinnGen                                                        | 3,899/214,893                           | European        | <a href="https://www.finngen.fi/">https://www.finngen.fi/</a> |
| PD            | International<br>Parkinson's Disease<br>Genomics<br>Consortium | 33,674/449,056                          | European        | Nalls et al., 2019                                            |
| MS            | FinnGen                                                        | 1,048/217,141                           | European        | <a href="https://www.finngen.fi/">https://www.finngen.fi/</a> |

AD: Alzheimer's disease; ALS: amyotrophic lateral sclerosis; CD: Crohn's disease; IBD: inflammatory bowel disease; MS: multiple sclerosis; PD: Parkinson's disease; UC: ulcerative colitis.

**Supplementary Table S2. Detailed information for SNPs in the Mendelian Randomization analysis of inflammatory bowel disease (IBD) on neurodegenerative disorders.**

| SNP         | Chr | Location  | Association with ALS |      |      | Association with AD |      |      | Association with PD |      |       | Association with MS |      |       |
|-------------|-----|-----------|----------------------|------|------|---------------------|------|------|---------------------|------|-------|---------------------|------|-------|
|             |     |           | $\beta$              | SE   | P    | $\beta$             | SE   | P    | $\beta$             | SE   | P     | $\beta$             | SE   | P     |
| rs10041497  | 5   | 142135017 | -0.17                | 0.17 | 0.31 | -0.40               | 0.32 | 0.21 | 0.30                | 0.24 | 0.20  | 0.40                | 0.58 | 0.49  |
| rs10114470  | 9   | 114785492 | -0.07                | 0.10 | 0.48 | <0.01               | 0.20 | 0.99 | -0.05               | 0.12 | 0.66  | 0.33                | 0.36 | 0.36  |
| rs10761659  | 10  | 62685804  | 0.06                 | 0.09 | 0.46 | -0.22               | 0.16 | 0.17 | 0.06                | 0.11 | 0.56  | -0.24               | 0.28 | 0.40  |
| rs10800309  | 1   | 161502368 | 0.02                 | 0.12 | 0.89 | -0.21               | 0.21 | 0.32 | -0.33               | 0.15 | 0.02  | 0.06                | 0.38 | 0.88  |
| rs10826797  | 10  | 30401447  | 0.11                 | 0.15 | 0.47 | -0.15               | 0.27 | 0.57 | 0.19                | 0.25 | 0.46  | -1.04               | 0.48 | 0.03  |
| rs10953551  | 7   | 107840456 | -0.13                | 0.14 | 0.33 | 0.23                | 0.25 | 0.35 | -0.17               | 0.17 | 0.31  | 0.82                | 0.45 | 0.07  |
| rs11066188  | 12  | 112172910 | -0.36                | 0.16 | 0.03 | 0.33                | 0.30 | 0.27 | 0.03                | 0.20 | 0.86  | 1.55                | 0.53 | <0.01 |
| rs111456533 | 10  | 124750812 | 0.20                 | 0.18 | 0.26 | 0.49                | 0.39 | 0.21 | 0.13                | 0.29 | 0.67  | 0.06                | 0.68 | 0.93  |
| rs11152949  | 6   | 106001210 | -0.30                | 0.15 | 0.04 | 0.10                | 0.29 | 0.74 | 0.32                | 0.20 | 0.10  | -0.67               | 0.51 | 0.19  |
| rs11195128  | 10  | 110426390 | 0.14                 | 0.18 | 0.44 | /                   | /    | /    | 0.22                | 0.29 | 0.45  | /                   | /    | /     |
| rs11209013  | 1   | 67190603  | 0.14                 | 0.18 | 0.44 | <0.01               | 0.32 | 0.99 | -0.17               | 0.22 | 0.43  | 0.30                | 0.58 | 0.61  |
| rs11221335  | 11  | 128516011 | -0.14                | 0.20 | 0.47 | 0.61                | 0.36 | 0.09 | /                   | /    | /     | 1.08                | 0.64 | 0.09  |
| rs11236797  | 11  | 76588605  | <0.01                | 0.09 | 0.98 | -0.19               | 0.17 | 0.27 | -0.26               | 0.12 | 0.02  | <0.01               | 0.31 | 0.99  |
| rs112936798 | 1   | 39336709  | -0.17                | 0.28 | 0.54 | 0.36                | 0.34 | 0.29 | 0.38                | 0.38 | 0.33  | -0.38               | 0.59 | 0.52  |
| rs1131095   | 3   | 49676792  | -0.10                | 0.09 | 0.25 | -0.21               | 0.16 | 0.19 | 0.01                | 0.11 | 0.95  | -0.17               | 0.28 | 0.55  |
| rs11548656  | 16  | 81883307  | 0.27                 | 0.16 | 0.09 | 0.20                | 0.25 | 0.42 | 0.17                | 0.24 | 0.49  | 0.06                | 0.46 | 0.90  |
| rs11581607  | 1   | 67242007  | -0.04                | 0.04 | 0.29 | -0.02               | 0.09 | 0.86 | 0.01                | 0.05 | 0.80  | -0.12               | 0.17 | 0.47  |
| rs11669299  | 19  | 10385945  | 0.11                 | 0.16 | 0.49 | 0.37                | 0.30 | 0.21 | /                   | /    | /     | 0.96                | 0.54 | 0.07  |
| rs11677002  | 2   | 28391534  | -0.19                | 0.15 | 0.20 | 0.18                | 0.27 | 0.50 | -0.05               | 0.20 | 0.82  | -0.79               | 0.48 | 0.10  |
| rs11734570  | 4   | 38586832  | -0.17                | 0.21 | 0.41 | -0.74               | 0.36 | 0.04 | 0.06                | 0.33 | 0.85  | -0.27               | 0.65 | 0.68  |
| rs11768365  | 7   | 6505557   | 0.26                 | 0.20 | 0.21 | 0.28                | 0.35 | 0.41 | 0.25                | 0.27 | 0.36  | -0.26               | 0.62 | 0.67  |
| rs117981694 | 12  | 40428296  | -0.16                | 0.13 | 0.23 | 0.06                | 0.22 | 0.79 | 0.60                | 0.16 | <0.01 | 0.54                | 0.41 | 0.19  |
| rs12136659  | 1   | 172875110 | -0.27                | 0.19 | 0.15 | -0.23               | 0.31 | 0.45 | 0.23                | 0.23 | 0.31  | -0.61               | 0.57 | 0.28  |
| rs1250573   | 10  | 79282718  | -0.29                | 0.15 | 0.06 | 0.14                | 0.27 | 0.59 | 0.08                | 0.25 | 0.75  | -1.03               | 0.48 | 0.03  |

|             |    |           |       |      |       |       |      |      |       |      |       |       |      |       |
|-------------|----|-----------|-------|------|-------|-------|------|------|-------|------|-------|-------|------|-------|
| rs1268339   | 1  | 1280044   | 0.07  | 0.21 | 0.73  | -0.23 | 0.30 | 0.45 | -0.22 | 0.28 | 0.44  | 0.27  | 0.53 | 0.61  |
| rs12825700  | 12 | 68099200  | -0.19 | 0.11 | 0.08  | -0.19 | 0.20 | 0.35 | 0.09  | 0.13 | 0.50  | 0.15  | 0.36 | 0.69  |
| rs12936409  | 17 | 39887396  | -0.01 | 0.10 | 0.90  | 0.31  | 0.18 | 0.08 | 0.14  | 0.12 | 0.23  | 0.29  | 0.32 | 0.37  |
| rs1297264   | 21 | 15443698  | 0.05  | 0.09 | 0.57  | -0.14 | 0.18 | 0.43 | 0.37  | 0.12 | <0.01 | -0.22 | 0.31 | 0.48  |
| rs1317209   | 1  | 19813543  | 0.12  | 0.15 | 0.44  | -0.24 | 0.26 | 0.36 | 0.02  | 0.25 | 0.94  | 0.39  | 0.46 | 0.40  |
| rs1336900   | 1  | 150706557 | 0.03  | 0.16 | 0.87  | -0.05 | 0.30 | 0.86 | 0.25  | 0.28 | 0.36  | -0.12 | 0.54 | 0.83  |
| rs13422838  | 2  | 186638119 | -0.35 | 0.20 | 0.07  | -0.99 | 0.43 | 0.02 | /     | /    | /     | 0.97  | 0.76 | 0.21  |
| rs140933577 | 13 | 40262133  | <0.01 | 0.18 | 1.00  | /     | /    | /    | /     | /    | /     | /     | /    | /     |
| rs143210366 | 6  | 31524576  | 0.10  | 0.13 | 0.45  | -0.19 | 0.19 | 0.33 | /     | /    | /     | -0.23 | 0.37 | 0.53  |
| rs1445004   | 5  | 40414317  | -0.02 | 0.08 | 0.83  | -0.10 | 0.15 | 0.49 | 0.02  | 0.10 | 0.84  | 0.88  | 0.27 | <0.01 |
| rs145568234 | 6  | 32279268  | 0.06  | 0.12 | 0.60  | -0.36 | 0.25 | 0.15 | 0.10  | 0.10 | 0.31  | 0.07  | 0.48 | 0.89  |
| rs1456896   | 7  | 50264865  | 0.08  | 0.17 | 0.62  | 0.28  | 0.32 | 0.38 | -0.30 | 0.21 | 0.15  | 0.89  | 0.56 | 0.12  |
| rs149169037 | 7  | 20537675  | -0.09 | 0.19 | 0.63  | /     | /    | /    | /     | /    | /     | /     | /    | /     |
| rs154873    | 20 | 59279977  | -0.04 | 0.18 | 0.81  | 0.20  | 0.32 | 0.52 | 0.04  | 0.26 | 0.87  | 0.01  | 0.57 | 0.98  |
| rs1558619   | 2  | 102315090 | -0.20 | 0.16 | 0.22  | 0.14  | 0.30 | 0.64 | 0.31  | 0.21 | 0.13  | 0.35  | 0.53 | 0.50  |
| rs16940202  | 16 | 85980635  | -0.19 | 0.16 | 0.22  | 0.49  | 0.32 | 0.12 | 0.01  | 0.19 | 0.97  | 0.54  | 0.56 | 0.34  |
| rs17656349  | 5  | 150226431 | 0.02  | 0.19 | 0.90  | -0.04 | 0.35 | 0.91 | 0.25  | 0.31 | 0.41  | -0.18 | 0.63 | 0.78  |
| rs1864239   | 15 | 79913012  | /     | /    | /     | -0.01 | 0.04 | 0.86 | <0.01 | 0.14 | 0.98  | 0.06  | 0.07 | 0.42  |
| rs194746    | 14 | 68816170  | -0.13 | 0.16 | 0.41  | <0.01 | 0.30 | 1.00 | -0.28 | 0.21 | 0.18  | 0.67  | 0.54 | 0.21  |
| rs212402    | 6  | 159051263 | 0.43  | 0.20 | 0.03  | 0.50  | 0.37 | 0.18 | 0.17  | 0.27 | 0.51  | -1.19 | 0.66 | 0.07  |
| rs2301127   | 16 | 11273620  | -0.68 | 0.18 | <0.01 | 0.26  | 0.33 | 0.42 | 0.19  | 0.22 | 0.39  | 2.17  | 0.58 | <0.01 |
| rs2384352   | 16 | 11273620  | -0.08 | 0.15 | 0.61  | 0.22  | 0.28 | 0.42 | -0.25 | 0.13 | 0.05  | 1.26  | 0.49 | 0.01  |
| rs2413583   | 22 | 39263768  | -0.08 | 0.11 | 0.44  | -0.19 | 0.23 | 0.40 | -0.25 | 0.28 | 0.37  | 0.09  | 0.40 | 0.82  |
| rs243505    | 17 | 148738247 | -0.12 | 0.18 | 0.50  | -0.04 | 0.32 | 0.91 | /     | /    | /     | 0.01  | 0.58 | 0.99  |
| rs2593855   | 3  | 71126344  | 0.03  | 0.18 | 0.85  | /     | /    | /    | /     | /    | /     | /     | /    | /     |
| rs2836881   | 21 | 39094373  | -0.02 | 0.09 | 0.84  | -0.20 | 0.18 | 0.26 | -0.01 | 0.12 | 0.90  | -0.20 | 0.32 | 0.53  |
| rs28374519  | 16 | 28478021  | -0.03 | 0.14 | 0.85  | 0.05  | 0.24 | 0.83 | /     | /    | /     | 0.38  | 0.43 | 0.38  |
| rs2838517   | 21 | 44193942  | 0.03  | 0.11 | 0.80  | /     | /    | /    | 0.07  | 0.14 | 0.59  | /     | /    | /     |



|            |    |           |       |      |      |       |      |      |       |      |      |       |      |       |
|------------|----|-----------|-------|------|------|-------|------|------|-------|------|------|-------|------|-------|
| rs3024493  | 1  | 206770623 | 0.15  | 0.10 | 0.14 | 0.07  | 0.18 | 0.70 | -0.03 | 0.13 | 0.84 | 0.12  | 0.33 | 0.71  |
| rs341295   | 5  | 112513193 | -0.01 | 0.20 | 0.98 | -0.36 | 0.36 | 0.32 | 0.10  | 0.32 | 0.75 | 0.64  | 0.64 | 0.32  |
| rs34140409 | 6  | 31955877  | 0.13  | 0.15 | 0.39 | -0.09 | 0.33 | 0.78 | /     | /    | /    | 1.64  | 0.61 | 0.01  |
| rs35171809 | 6  | 167019278 | -0.18 | 0.13 | 0.15 | 0.24  | 0.23 | 0.31 | -0.35 | 0.19 | 0.06 | -0.97 | 0.42 | 0.02  |
| rs3792111  | 2  | 233271044 | -0.01 | 0.10 | 0.89 | 0.14  | 0.18 | 0.44 | -0.02 | 0.12 | 0.88 | -0.01 | 0.32 | 0.98  |
| rs3820330  | 1  | 19815920  | 0.07  | 0.17 | 0.68 | -0.18 | 0.31 | 0.56 | 0.08  | 0.23 | 0.73 | -0.71 | 0.55 | 0.20  |
| rs3829110  | 9  | 136374746 | -0.08 | 0.09 | 0.39 | -0.19 | 0.16 | 0.25 | 0.20  | 0.11 | 0.06 | -0.01 | 0.29 | 0.97  |
| rs3850378  | 14 | 87951173  | 0.01  | 0.16 | 0.92 | /     | /    | /    | -0.12 | 0.19 | 0.55 | /     | /    | /     |
| rs3897234  | 13 | 26967893  | 0.28  | 0.17 | 0.10 | -0.08 | 0.30 | 0.79 | -0.14 | 0.22 | 0.51 | 0.27  | 0.54 | 0.61  |
| rs4256018  | 20 | 6113242   | -0.17 | 0.20 | 0.38 | -0.08 | 0.41 | 0.84 | 0.49  | 0.25 | 0.05 | -0.07 | 0.73 | 0.92  |
| rs4276914  | 1  | 155169753 | -0.11 | 0.17 | 0.53 | 0.12  | 0.32 | 0.70 | -0.27 | 0.22 | 0.22 | 0.60  | 0.57 | 0.30  |
| rs4380956  | 8  | 125516832 | -0.13 | 0.16 | 0.39 | 0.05  | 0.31 | 0.88 | -0.04 | 0.19 | 0.85 | 1.75  | 0.55 | <0.01 |
| rs4676408  | 2  | 240634984 | -0.08 | 0.14 | 0.57 | <0.01 | 0.26 | 0.98 | -0.07 | 0.18 | 0.72 | 0.44  | 0.46 | 0.34  |
| rs4807569  | 19 | 1123379   | 0.09  | 0.13 | 0.52 | -0.07 | 0.23 | 0.76 | 0.10  | 0.21 | 0.65 | -0.19 | 0.42 | 0.65  |
| rs4957256  | 5  | 40207040  | 0.02  | 0.15 | 0.88 | 0.35  | 0.24 | 0.15 | <0.01 | 0.20 | 0.99 | 0.52  | 0.42 | 0.22  |
| rs503734   | 3  | 101304904 | -0.12 | 0.20 | 0.55 | 0.26  | 0.37 | 0.48 | -0.20 | 0.26 | 0.44 | 1.08  | 0.65 | 0.10  |
| rs55946629 | 2  | 43624107  | <0.01 | 0.16 | 0.98 | 0.39  | 0.36 | 0.28 | -0.05 | 0.22 | 0.82 | 0.10  | 0.63 | 0.88  |
| rs56062135 | 15 | 67163292  | -0.14 | 0.12 | 0.25 | 0.26  | 0.21 | 0.20 | -0.06 | 0.14 | 0.70 | 0.22  | 0.37 | 0.55  |
| rs56116661 | 13 | 188683372 | -0.33 | 0.18 | 0.07 | -0.31 | 0.30 | 0.30 | -0.22 | 0.28 | 0.45 | 0.59  | 0.54 | 0.27  |
| rs56235845 | 5  | 177371039 | -0.22 | 0.17 | 0.19 | /     | /    | /    | /     | /    | /    | /     | /    | /     |
| rs5754100  | 22 | 21561877  | -0.27 | 0.14 | 0.06 | 0.09  | 0.21 | 0.67 | /     | /    | /    | -0.70 | 0.38 | 0.07  |
| rs5763793  | 22 | 30130643  | 0.04  | 0.19 | 0.84 | 0.16  | 0.35 | 0.66 | 0.15  | 0.24 | 0.53 | 0.25  | 0.62 | 0.69  |
| rs6017342  | 20 | 44436388  | 0.24  | 0.13 | 0.08 | 0.06  | 0.22 | 0.78 | -0.06 | 0.15 | 0.68 | -0.32 | 0.39 | 0.42  |
| rs6062496  | 20 | 63697746  | 0.08  | 0.11 | 0.48 | 0.30  | 0.19 | 0.11 | -0.31 | 0.13 | 0.02 | 0.31  | 0.34 | 0.37  |
| rs6063502  | 20 | 50339058  | 0.09  | 0.21 | 0.66 | -0.84 | 0.35 | 0.02 | 0.38  | 0.33 | 0.25 | -0.14 | 0.63 | 0.83  |
| rs62126610 | 19 | 33257277  | -0.19 | 0.14 | 0.17 | /     | /    | /    | /     | /    | /    | /     | /    | /     |
| rs62183956 | 2  | 218181399 | 0.35  | 0.18 | 0.05 | -0.05 | 0.33 | 0.88 | -0.45 | 0.23 | 0.04 | 0.61  | 0.58 | 0.30  |
| rs62324212 | 4  | 122639784 | 0.27  | 0.16 | 0.09 | -0.32 | 0.29 | 0.27 | -0.04 | 0.22 | 0.86 | 0.99  | 0.52 | 0.05  |

|                                 |    |           |       |      |      |       |      |      |       |      |      |       |      |      |
|---------------------------------|----|-----------|-------|------|------|-------|------|------|-------|------|------|-------|------|------|
| rs62378712                      | 5  | 159187037 | -0.20 | 0.20 | 0.32 | -0.26 | 0.40 | 0.51 | -0.16 | 0.28 | 0.57 | -0.25 | 0.70 | 0.72 |
| rs62408218                      | 6  | 90222139  | -0.25 | 0.17 | 0.15 | -0.82 | 0.35 | 0.02 | 0.05  | 0.22 | 0.82 | -0.63 | 0.62 | 0.31 |
| rs62482552                      | 7  | 100924735 | -0.24 | 0.20 | 0.22 | -0.32 | 0.35 | 0.36 | 0.23  | 0.27 | 0.39 | -0.83 | 0.63 | 0.18 |
| rs6457681                       | 6  | 32805720  | 0.03  | 0.10 | 0.79 | /     | /    | /    | 0.24  | 0.14 | 0.08 | /     | /    | /    |
| rs6579807                       | 5  | 150907283 | -0.09 | 0.16 | 0.55 | -0.05 | 0.30 | 0.86 | 0.17  | 0.20 | 0.38 | -1.24 | 0.53 | 0.02 |
| rs6584282                       | 10 | 99526738  | 0.06  | 0.09 | 0.48 | -0.31 | 0.17 | 0.06 | 0.15  | 0.11 | 0.17 | -0.06 | 0.30 | 0.83 |
| rs6740847                       | 2  | 181443625 | -0.03 | 0.15 | 0.82 | -0.22 | 0.28 | 0.43 | -0.04 | 0.21 | 0.84 | 0.82  | 0.50 | 0.10 |
| rs6873866                       | 5  | 96912106  | -0.05 | 0.15 | 0.74 | /     | /    | /    | /     | /    | /    | /     | /    | /    |
| rs6933404                       | 6  | 137638098 | 0.45  | 0.20 | 0.02 | -0.13 | 0.38 | 0.73 | -0.34 | 0.24 | 0.16 | -0.19 | 0.66 | 0.77 |
| rs714910                        | 17 | 34290246  | -0.02 | 0.16 | 0.92 | 0.06  | 0.28 | 0.82 | -0.27 | 0.20 | 0.18 | 0.41  | 0.50 | 0.41 |
| rs7190426                       | 16 | 23844532  | -0.07 | 0.19 | 0.72 | -0.33 | 0.42 | 0.43 | 0.10  | 0.26 | 0.69 | 0.14  | 0.75 | 0.85 |
| rs7256518                       | 19 | 10515699  | 0.03  | 0.19 | 0.87 | 0.14  | 0.36 | 0.70 | 0.08  | 0.23 | 0.72 | 1.15  | 0.64 | 0.07 |
| rs72852162                      | 2  | 145486323 | /     | /    | /    | 0.16  | 0.33 | 0.64 | /     | /    | /    | 0.36  | 0.59 | 0.55 |
| rs744166                        | 17 | 42362183  | -0.06 | 0.20 | 0.76 | -0.04 | 0.23 | 0.88 | 0.18  | 0.16 | 0.26 | -0.88 | 0.41 | 0.03 |
| rs749910                        | 16 | 50724938  | 0.02  | 0.12 | 0.84 | -0.04 | 0.18 | 0.82 | 0.13  | 0.10 | 0.17 | 0.26  | 0.32 | 0.42 |
| rs7532133                       | 1  | 160881744 | -0.03 | 0.19 | 0.86 | -0.08 | 0.34 | 0.81 | 0.07  | 0.23 | 0.76 | 0.02  | 0.61 | 0.97 |
| rs755374                        | 5  | 159402286 | -0.03 | 0.09 | 0.69 | 0.13  | 0.16 | 0.41 | -0.03 | 0.11 | 0.78 | 0.04  | 0.28 | 0.89 |
| rs7608697                       | 2  | 60977506  | -0.09 | 0.10 | 0.37 | 0.21  | 0.19 | 0.25 | -0.33 | 0.12 | 0.01 | 0.56  | 0.33 | 0.09 |
| rs76286777                      | 2  | 24972708  | 0.07  | 0.17 | 0.69 | 0.76  | 0.37 | 0.04 | -0.07 | 0.21 | 0.73 | 0.55  | 0.65 | 0.40 |
| rs78771661                      | 2  | 22129337  | -0.30 | 0.18 | 0.10 | 0.16  | 0.35 | 0.64 | -0.02 | 0.22 | 0.91 | 0.52  | 0.60 | 0.38 |
| rs7918084                       | 10 | 92669710  | 0.27  | 0.19 | 0.16 | -0.33 | 0.36 | 0.35 | -0.12 | 0.25 | 0.62 | -1.35 | 0.63 | 0.03 |
| rs80262450                      | 18 | 12818923  | -0.18 | 0.14 | 0.20 | 0.19  | 0.24 | 0.45 | -0.10 | 0.18 | 0.57 | -0.75 | 0.44 | 0.08 |
| rs938650                        | 8  | 128540294 | -0.04 | 0.19 | 0.85 | 0.30  | 0.36 | 0.41 | -0.29 | 0.23 | 0.21 | 0.43  | 0.66 | 0.51 |
| rs9934775                       | 16 | 50349166  | -0.03 | 0.16 | 0.86 | -0.26 | 0.33 | 0.42 | 0.10  | 0.27 | 0.72 | -0.84 | 0.57 | 0.14 |
| All - Inverse variance weighted |    |           | -0.03 | 0.01 | 0.03 | -0.01 | 0.02 | 0.58 | 0.01  | 0.02 | 0.50 | 0.08  | 0.05 | 0.10 |
| All - MR Egger                  |    |           | -0.02 | 0.03 | 0.66 | -0.01 | 0.04 | 0.76 | 0.05  | 0.04 | 0.24 | 0.03  | 0.09 | 0.75 |

AD: Alzheimer's disease; ALS: amyotrophic lateral sclerosis; Chr: chromosome; IBD: inflammatory bowel disease; IVW: Inverse variance weighted;

MS: multiple sclerosis; PD: Parkinson's disease; SE: standard error; SNP: single-nucleotide polymorphism.

**Supplementary Table S3. Mendelian randomization (MR) analysis for the causality ulcerative colitis (UC) and Crohn's disease (CD) on neurodegenerative disorders.**

| Exposure | Outcome | Method          | SNPs | Mendelian randomization |      |      | Heterogeneity |        |       |
|----------|---------|-----------------|------|-------------------------|------|------|---------------|--------|-------|
|          |         |                 |      | OR                      | LL   | UL   | P             | Q      | Q_P   |
| CD       | ALS     | IVW             | 78   | 0.97                    | 0.95 | 1.00 | 0.02          | 77.55  | 0.46  |
|          |         | MR Egger        | 78   | 1.02                    | 0.96 | 1.09 | 0.52          | 75.01  | 0.51  |
|          |         | Weighted median | 78   | 0.99                    | 0.96 | 1.02 | 0.50          |        |       |
|          |         | Weighted mode   | 78   | 1.00                    | 0.94 | 1.05 | 0.87          |        |       |
|          |         | MR PERSSO       | 78   | 0.97                    | 0.95 | 0.99 | 0.02          |        |       |
|          | AD      | IVW             | 74   | 1.00                    | 0.96 | 1.05 | 0.94          | 49.58  | 0.45  |
|          |         | MR Egger        | 74   | 1.02                    | 0.90 | 1.15 | 0.76          | 45.98  | 0.56  |
|          |         | Weighted median | 74   | 1.02                    | 0.96 | 1.08 | 0.56          |        |       |
|          |         | Weighted mode   | 74   | 1.03                    | 0.93 | 1.13 | 0.59          |        |       |
|          | PD      | IVW             | 71   | 1.01                    | 0.98 | 1.05 | 0.43          | 94.55  | 0.03  |
|          |         | MR Egger        | 71   | 1.09                    | 1.00 | 1.18 | 0.05          | 89.96  | 0.05  |
|          |         | Weighted median | 71   | 1.01                    | 0.96 | 1.06 | 0.67          |        |       |
|          |         | Weighted mode   | 71   | 1.00                    | 0.94 | 1.07 | 0.97          |        |       |
|          | MS      | IVW             | 74   | 1.03                    | 0.93 | 1.15 | 0.53          | 148.87 | <0.01 |
|          |         | MR Egger        | 74   | 0.98                    | 0.74 | 1.30 | 0.91          | 148.58 | <0.01 |
|          |         | Weighted median | 74   | 1.07                    | 0.94 | 1.21 | 0.30          |        |       |
|          |         | Weighted mode   | 74   | 1.07                    | 0.90 | 1.28 | 0.46          |        |       |
| UC       | ALS     | IVW             | 52   | 1.01                    | 0.98 | 1.03 | 0.68          | 40.34  | 0.86  |
|          |         | MR Egger        | 52   | 1.02                    | 0.94 | 1.11 | 0.60          | 40.18  | 0.84  |
|          |         | Weighted median | 52   | 1.00                    | 0.96 | 1.04 | 0.94          |        |       |
|          |         | Weighted mode   | 52   | 1.02                    | 0.95 | 1.10 | 0.55          |        |       |
|          | AD      | IVW             | 50   | 0.99                    | 0.94 | 1.04 | 0.73          | 49.58  | 0.45  |
|          |         | MR Egger        | 50   | 1.14                    | 0.98 | 1.33 | 0.10          | 45.98  | 0.56  |
|          |         | Weighted median | 50   | 0.95                    | 0.88 | 1.04 | 0.26          |        |       |
|          |         | Weighted mode   | 50   | 0.90                    | 0.72 | 1.11 | 0.32          |        |       |
|          | PD      | IVW             | 49   | 0.99                    | 0.96 | 1.03 | 0.78          | 51.30  | 0.35  |
|          |         | MR Egger        | 49   | 1.01                    | 0.91 | 1.13 | 0.80          | 51.15  | 0.31  |
|          |         | Weighted median | 49   | 1.01                    | 0.96 | 1.06 | 0.78          |        |       |
|          |         | Weighted mode   | 49   | 1.02                    | 0.94 | 1.10 | 0.68          |        |       |
|          | MS      | IVW             | 49   | 1.11                    | 0.95 | 1.30 | 0.20          | 121.31 | <0.01 |
|          |         | MR Egger        | 49   | 0.93                    | 0.54 | 1.60 | 0.78          | 120.14 | <0.01 |
|          |         | Weighted median | 49   | 1.03                    | 0.89 | 1.19 | 0.67          |        |       |
|          |         | Weighted mode   | 49   | 0.92                    | 0.71 | 1.18 | 0.49          |        |       |

AD: Alzheimer's disease; ALS: amyotrophic lateral sclerosis; CD: Crohn's disease; IVW: Inverse variance weighted; LL: lower limits of odds ratio; OR: Odds ratio; PD: Parkinson's disease; SNP: single-nucleotide polymorphism; UC: ulcerative colitis; MS: multiple sclerosis; UL: upper limits of odds ratio.

**Supplementary Table S4. Assessment of pleiotropy.**

| Exposure | Outcome | MR-Egger intercept |          |          | MR PRESSO global test |          |
|----------|---------|--------------------|----------|----------|-----------------------|----------|
|          |         | Intercept          | SE       | <i>P</i> | RSSobs                | <i>P</i> |
| IBD      | ALS     | -0.00201           | 0.004186 | 0.632572 | 115.3298              | 0.211    |
|          | AD      | -0.00011           | 0.005126 | 0.983122 | 91.2978               | 0.600    |
|          | PD      | -0.00558           | 0.005688 | 0.329295 | 116.9115              | 0.033    |
|          | MS      | 0.00958            | 0.012046 | 0.428585 | 161.6244              | <0.001   |
| UC       | ALS     | -0.00252           | 0.006287 | 0.690204 | 42.1793               | 0.865    |
|          | AD      | -0.02302           | 0.012122 | 0.063533 | 53.1721               | 0.383    |
|          | PD      | -0.00328           | 0.008716 | 0.708321 | 53.6505               | 0.306    |
|          | MS      | 0.027634           | 0.040836 | 0.501911 | 126.469               | <0.001   |
| CD       | ALS     | -0.00814           | 0.005105 | 0.114797 | 79.8534               | 0.461    |
|          | AD      | -0.02302           | 0.012122 | 0.063533 | 53.1721               | 0.402    |
|          | PD      | -0.01352           | 0.007206 | 0.064890 | 97.5203               | 0.033    |
|          | MS      | 0.00877            | 0.023651 | 0.712005 | 152.7905              | <0.001   |

AD: Alzheimer's disease; ALS: amyotrophic lateral sclerosis; Chr: chromosome; IBD: inflammatory bowel disease; IVW: Inverse variance weighted; MS: multiple sclerosis; PD: Parkinson's disease; SE: standard error.

**Supplementary Table S5. Mendelian randomization (MR) analysis for the causality of neurodegenerative disorders on inflammatory bowel disease (IBD), including ulcerative colitis (UC) and Crohn's disease (CD).**

| Exposure | Outcome | Method          | SNPs | Mendelian randomization |      |      |       |
|----------|---------|-----------------|------|-------------------------|------|------|-------|
|          |         |                 |      | OR                      | LL   | UL   | P     |
| ALS      | IBD     | IVW             | 4    | 1.00                    | 0.89 | 1.12 | 1.00  |
|          |         | MR Egger        | 4    | 0.92                    | 0.70 | 1.20 | 0.59  |
|          |         | Weighted median | 4    | 1.03                    | 0.90 | 1.19 | 0.65  |
|          |         | Weighted mode   | 4    | 1.05                    | 0.91 | 1.20 | 0.57  |
|          | UC      | IVW             | 4    | 0.98                    | 0.82 | 1.17 | 0.78  |
|          |         | MR Egger        | 4    | 0.77                    | 0.54 | 1.10 | 0.29  |
|          |         | Weighted median | 4    | 1.04                    | 0.87 | 1.23 | 0.69  |
|          |         | Weighted mode   | 4    | 1.04                    | 0.85 | 1.27 | 0.75  |
|          | CD      | IVW             | 4    | 1.01                    | 0.86 | 1.18 | 0.94  |
|          |         | MR Egger        | 4    | 1.04                    | 0.67 | 1.62 | 0.87  |
|          |         | Weighted median | 4    | 1.06                    | 0.90 | 1.25 | 0.50  |
|          |         | Weighted mode   | 4    | 1.08                    | 0.90 | 1.29 | 0.47  |
| AD       | IBD     | IVW             | 2    | 1.01                    | 0.98 | 1.04 | 0.58  |
|          |         | MR Egger        | /    | /                       | /    | /    | /     |
|          |         | Weighted median | /    | /                       | /    | /    | /     |
|          |         | Weighted mode   | /    | /                       | /    | /    | /     |
|          | UC      | IVW             | 2    | 1.00                    | 0.96 | 1.03 | 0.82  |
|          |         | MR Egger        | /    | /                       | /    | /    | /     |
|          |         | Weighted median | /    | /                       | /    | /    | /     |
|          |         | Weighted mode   | /    | /                       | /    | /    | /     |
|          | CD      | IVW             | 2    | 1.00                    | 0.97 | 1.04 | 0.78  |
|          |         | MR Egger        | /    | /                       | /    | /    | /     |
|          |         | Weighted median | /    | /                       | /    | /    | /     |
|          |         | Weighted mode   | /    | /                       | /    | /    | /     |
| PD       | IBD     | IVW             | 17   | 1.03                    | 0.99 | 1.08 | 0.19  |
|          |         | MR Egger        | 17   | 1.07                    | 0.96 | 1.19 | 0.25  |
|          |         | Weighted median | 17   | 1.03                    | 0.97 | 1.10 | 0.32  |
|          |         | Weighted mode   | 17   | 1.03                    | 0.94 | 1.12 | 0.56  |
|          | UC      | IVW             | 17   | 1.03                    | 0.97 | 1.09 | 0.30  |
|          |         | MR Egger        | 17   | 1.02                    | 0.89 | 1.18 | 0.74  |
|          |         | Weighted median | 17   | 1.06                    | 0.98 | 1.14 | 0.15  |
|          |         | Weighted mode   | 17   | 1.09                    | 0.97 | 1.22 | 0.16  |
|          | CD      | IVW             | 17   | 1.04                    | 0.98 | 1.10 | 0.24  |
|          |         | MR Egger        | 17   | 1.08                    | 0.94 | 1.24 | 0.31  |
|          |         | Weighted median | 17   | 1.03                    | 0.95 | 1.12 | 0.48  |
|          |         | Weighted mode   | 17   | 1.01                    | 0.88 | 1.15 | 0.89  |
| MS       | IBD     | IVW             | 4    | 1.11                    | 1.04 | 1.18 | <0.01 |
|          |         | MR Egger        | 4    | 1.54                    | 1.02 | 2.33 | 0.18  |
|          |         | Weighted median | 4    | 1.11                    | 1.07 | 1.14 | <0.01 |

|    |                 |   |      |      |      |       |
|----|-----------------|---|------|------|------|-------|
|    | Weighted mode   | 4 | 1.14 | 1.10 | 1.18 | 0.01  |
| UC | IVW             | 4 | 1.18 | 1.03 | 1.34 | 0.02  |
|    | MR Egger        | 4 | 2.71 | 1.19 | 6.18 | 0.14  |
|    | Weighted median | 4 | 1.11 | 1.04 | 1.18 | <0.01 |
|    | Weighted mode   | 4 | 1.26 | 1.20 | 1.33 | <0.01 |
| CD | IVW             | 4 | 1.04 | 0.98 | 1.11 | 0.23  |
|    | MR Egger        | 4 | 0.86 | 0.48 | 1.54 | 0.66  |
|    | Weighted median | 4 | 1.02 | 0.98 | 1.07 | 0.28  |
|    | Weighted mode   | 4 | 1.02 | 0.98 | 1.06 | 0.41  |

IBD: inflammatory bowel disease; AD: Alzheimer's disease; ALS: amyotrophic lateral sclerosis; CD: Crohn's disease; IVW: Inverse variance weighted; LL: lower limits of odds ratio; MS: multiple sclerosis; OR: Odds ratio; PD: Parkinson's disease; SNP: single-nucleotide polymorphism; UC: ulcerative colitis; UL: upper limits of odds ratio.

**Supplementary Table S6. Genetic correlation between inflammatory bowel disease (IBD) and amyotrophic lateral sclerosis (ALS).**

| <b><math>\rho</math></b> | <b>SE</b> | <b><i>P</i></b>        | <b>Correlation</b> |
|--------------------------|-----------|------------------------|--------------------|
| -0.0472                  | 0.0057    | $8.60 \times 10^{-17}$ | -0.3255            |

**Supplementary Table S7. Functional enrichment of shared risk loci.**

| Category           | Pathway (ID)                                                                       | <i>P</i> value | Adjusted <i>P</i> value |
|--------------------|------------------------------------------------------------------------------------|----------------|-------------------------|
| Biological Process | regulation of ER to Golgi vesicle-mediated transport (GO:0060628)                  | 0.0013         | 0.0149                  |
|                    | negative regulation of autophagosome assembly (GO:1902902)                         | 0.0019         | 0.0149                  |
|                    | regulation of establishment of protein localization (GO:0070201)                   | 0.0022         | 0.0149                  |
|                    | negative regulation of macroautophagy (GO:0016242)                                 | 0.0038         | 0.0149                  |
|                    | regulation of protein transport (GO:0051223)                                       | 0.0041         | 0.0149                  |
|                    | regulation of autophagosome assembly (GO:2000785)                                  | 0.0052         | 0.0149                  |
|                    | negative regulation of organelle assembly (GO:1902116)                             | 0.0052         | 0.0149                  |
|                    | regulation of transport (GO:0051049)                                               | 0.0055         | 0.0149                  |
|                    | regulation of intracellular transport (GO:0032386)                                 | 0.0058         | 0.0149                  |
|                    | COPII vesicle coating (GO:0048208)                                                 | 0.0094         | 0.0180                  |
|                    | vesicle coating (GO:0006901)                                                       | 0.0094         | 0.0180                  |
|                    | vesicle targeting, rough ER to cis-Golgi (GO:0048207)                              | 0.0094         | 0.0180                  |
|                    | COPII-coated vesicle budding (GO:0090114)                                          | 0.0104         | 0.0185                  |
|                    | retrograde vesicle-mediated transport, Golgi to endoplasmic reticulum (GO:0006890) | 0.0126         | 0.0191                  |
|                    | retrograde transport, endosome to Golgi (GO:0042147)                               | 0.0131         | 0.0191                  |
|                    | post-Golgi vesicle-mediated transport (GO:0006892)                                 | 0.0132         | 0.0191                  |
|                    | regulation of vesicle-mediated transport (GO:0060627)                              | 0.0143         | 0.0193                  |
|                    | cytosolic transport (GO:0016482)                                                   | 0.0173         | 0.0221                  |
|                    | endoplasmic reticulum to Golgi vesicle-mediated transport (GO:0006888)             | 0.0274         | 0.0332                  |
|                    | protein-containing complex assembly (GO:0065003)                                   | 0.0395         | 0.0454                  |
| Cellular Component | Golgi-associated vesicle (GO:0005798)                                              | 0.0070         | 0.0298                  |
|                    | cis-Golgi network (GO:0005801)                                                     | 0.0085         | 0.0298                  |
| Molecular Function | syntaxin binding (GO:0019905)                                                      | 0.0092         | 0.0092                  |

GO, Gene Ontology.
